# Supplementary material
Source: PubMed Central journal article supplement (PMC6200646)
Supplement: NIHMS1505579-supplement-1.pdf [file NIHMS1505579-supplement-1.pdf]

Supplemental Table 1: PCR primers used to generate DNA fragments required to assemble IL-2/CD25 FPs

| Primer | Description                       | Orientation | Primer                                                           | Purpose                                          |
|--------|-----------------------------------|-------------|------------------------------------------------------------------|--------------------------------------------------|
| 1      | pCIneo/Xho/koz/r                  | Reverse     | 5' ccatggcctcgcctcaggctagcctatagtg                               | Amplify and modify pCIneo vector                 |
| 2      | pCIneo/Not/Ink2/6xhis/stop/f      | Forward     | 5' ggtggacatcacccatcacccatcactaataagcgccgctcccttag               |                                                  |
| 3      | pCI/Koz/mL2/f                     | Forward     | 5'aatacgactcactataggctagcctcaggccaccatggacagatgcagctcgcaccc      | Amplify mL-2 fragments                           |
| 4      | mL2/Ink7/IL2ra/r                  | Reverse     | cagacacagttcacctccacctccacctcaggcctgttgagatgatg                  |                                                  |
| 5      | mL2/(G3S) <sub>3</sub> /r         | Reverse     | 5' cgaacctccacctgaacctccaccagaacctccaccttgaggcct                 |                                                  |
| 6      | mL2/(G4S) <sub>4</sub> /r         | Reverse     | 5' tccacctccacctgatccacctccaccagatccacctccaccttgaggcct           |                                                  |
| 7      | mL2/(G4S) <sub>5</sub> /r         | Reverse     | 5' ccacctgatccacctccaccagatccacctccacctgatccacctccaccttgaggcct   |                                                  |
| 8      | (G3S) <sub>3</sub> /mCD25/f       | Forward     | 5' ggtggaggttctggtggaggtcagggtggaggttcggaactgtgtctgtatgacct      | Amplify mCD25 fragments with various linkers     |
| 9      | (G3S) <sub>4</sub> /mCD25/f       | Forward     | 5' tctggtggaggtcagggtggaggttcgggtggaggttctgaactgtgtctgtatgacct   |                                                  |
| 10     | (G4S) <sub>4</sub> /mCD25/f       | Forward     | 5' ggtggatcagggtggaggtggatccggtggaggtggatctgaactgtgtctgtatgacct  |                                                  |
| 11     | (G4S) <sub>5</sub> /mCD25/f       | Forward     | 5' aggtggatcagggtggaggtggatccggtggaggtggatctgaactgtgtctgtatgacct |                                                  |
| 12     | mCD25/Ink/6xHis/stop/r            | Reverse     | 5' ttattagtgtggtgatggtgatgccaccaactgaggcctgttgagatgatg           |                                                  |
| 13     | (G3S) <sub>3</sub> /hCD25/Ink12/f | Forward     | 5' ggtggaggttctggtggaggtcagggtggaggttcggagctctgtgacgatgacct      | Amplify hCD25 fragment with 12 amino acid linker |
| 14     | hCD25/Ink/6xHis/r                 | Reverse     | 5' gtgatggtgatggtgatgccacctggtactctgtttaaataatgga                |                                                  |

Note: Fragment of mCD25 from primers 8/12 was used with the fragments of mL-2 from primers 3/5 and 3/6 to generate mL-2/mCD25 with 12 and 16 amino acid (G3S)<sub>3</sub> and (G3S)<sub>4</sub> linkers.

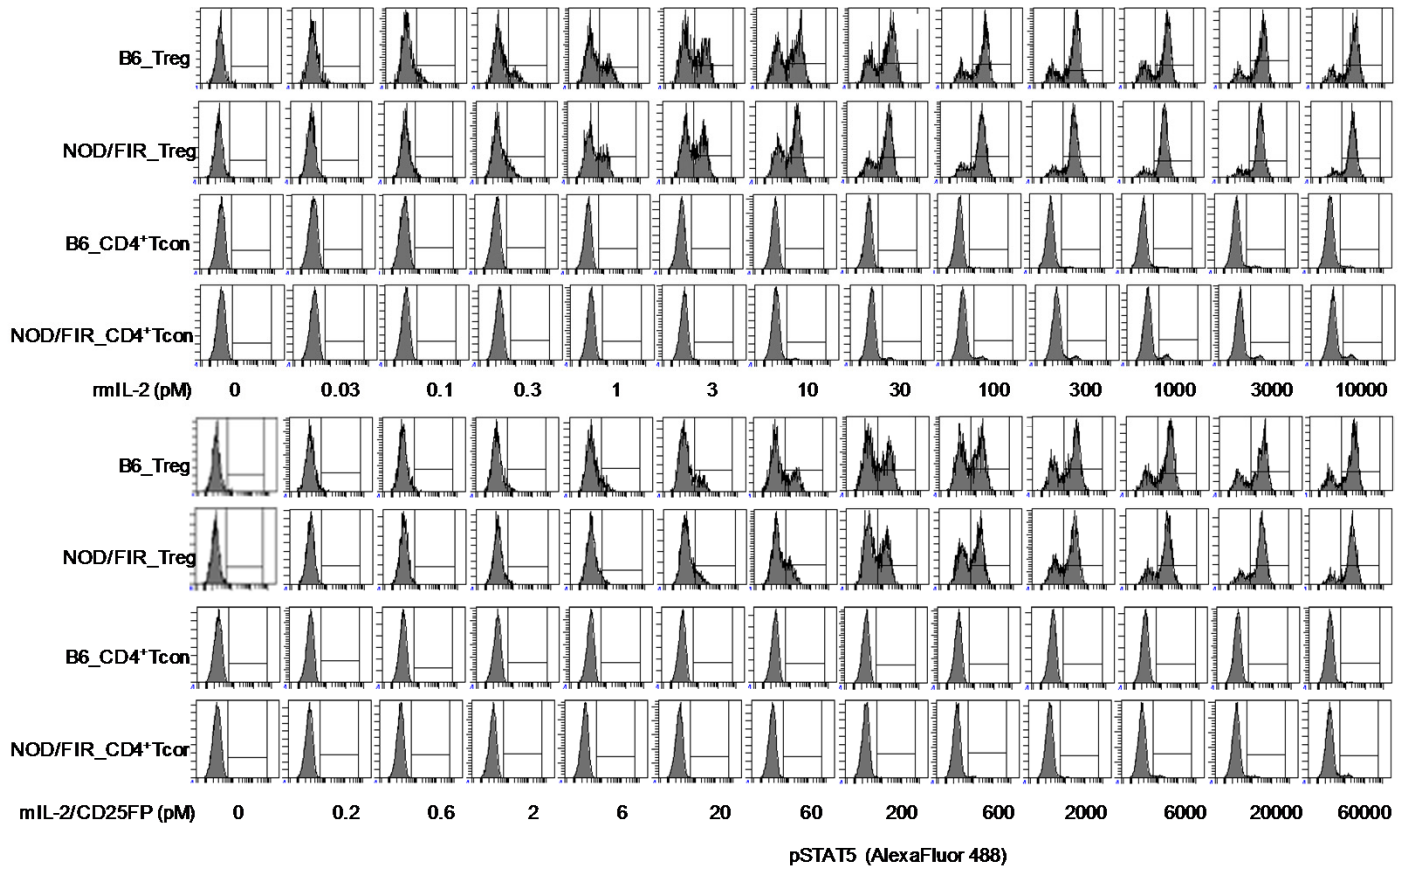

**Supplemental Figure 1.** Representative FACS histograms of CD4<sup>+</sup> Foxp3<sup>+</sup> and CD4<sup>+</sup> Foxp3<sup>-</sup> T cells from C57BL/6 and NOD-Foxp3/RFP (NOD/FIR) spleen cells after in vitro stimulation with the indicated concentrations of mIL-2 (top histograms) or mIL-2/mCD25 (bottom histograms).

**A**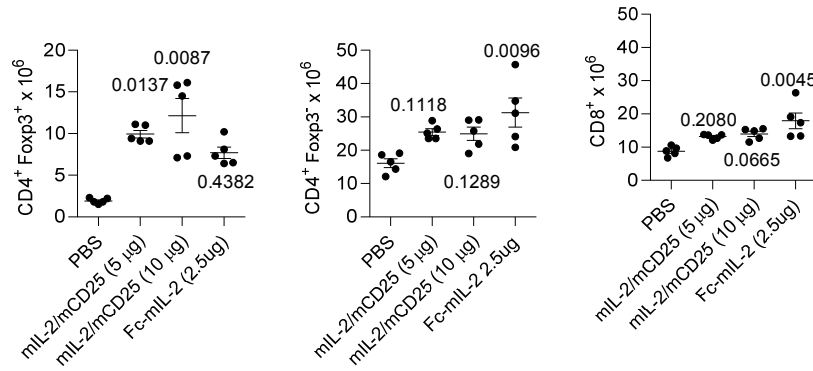**B**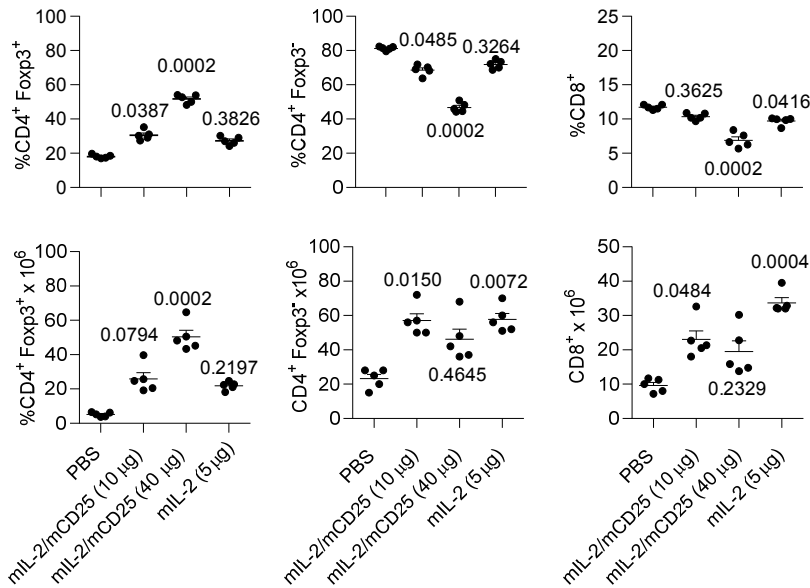

**Supplemental Figure 2.** Effect of mIL-2/mCD25 on T cells in male BALB/c mice. A) Mice (n=5/group) were treated with FC-mIL-2 on days 0, 2, 4, and 6 or with PBS or mIL-2/mCD25 on days 0, 2, and 6. 24 hr after the last injection, the numbers of the indicated T cell populations in the spleen were enumerated by FACS analysis. B) Mice (n=5/group) were treated with PBS or mIL-2 daily for 9 days or with mIL-2/mCD25 on days 0, 3, 6, and 9. 24 hr after the last injection, the percentage and numbers of the indicated T cell populations in the spleen were enumerated by FACS analysis. Data are shown as the mean  $\pm$  SEM. Numbers within the graphs represent the p values, which were determined by the Kruskal-Wallis one way ANOVA using the Dunn's multiple comparison test in relationship to the PBS control treated group.

**A**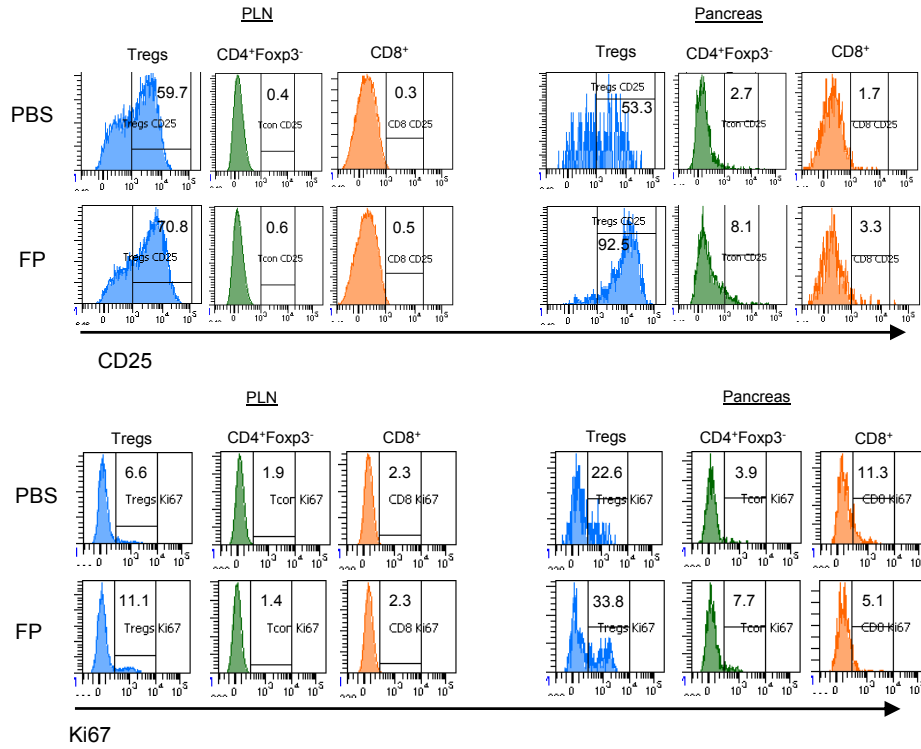**B**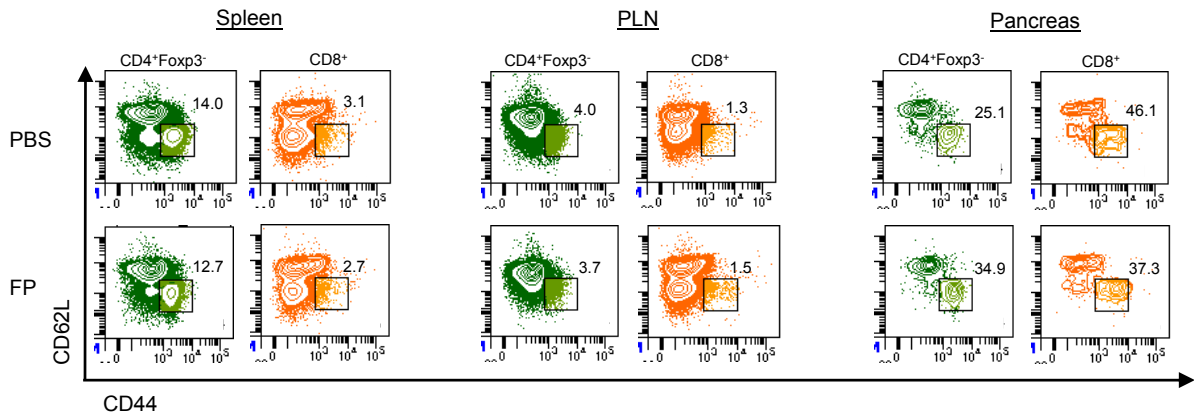

**Supplemental Figure 3.** Representative FACS plots for expression of CD25 and Ki67 (A) and CD44 vs CD62L (B) for the indicated cell populations 2-3 days after NOD mice received twice weekly injections of mIL-2/mCD25 FP (4  $\mu$ g) for 5 weeks. The numbers on each plot represent the percent positive cells within the indicated gate.
